# Supplementary material for: Use of Blood Donor Screening to Monitor Prevalence of HIV and Hepatitis B and C Viruses, South Africa
Source: PubMed Central journal article supplement (PMC5572879; doi:10.3201/eid2309.161594), 2017-09
Supplement: 16-1594-Techapp-s1.pdf [file 16-1594-Techapp-s1.pdf]

# Use of Blood Donor Screening to Monitor Prevalence of HIV and Hepatitis B and C Viruses, South Africa

## Technical Appendix 1

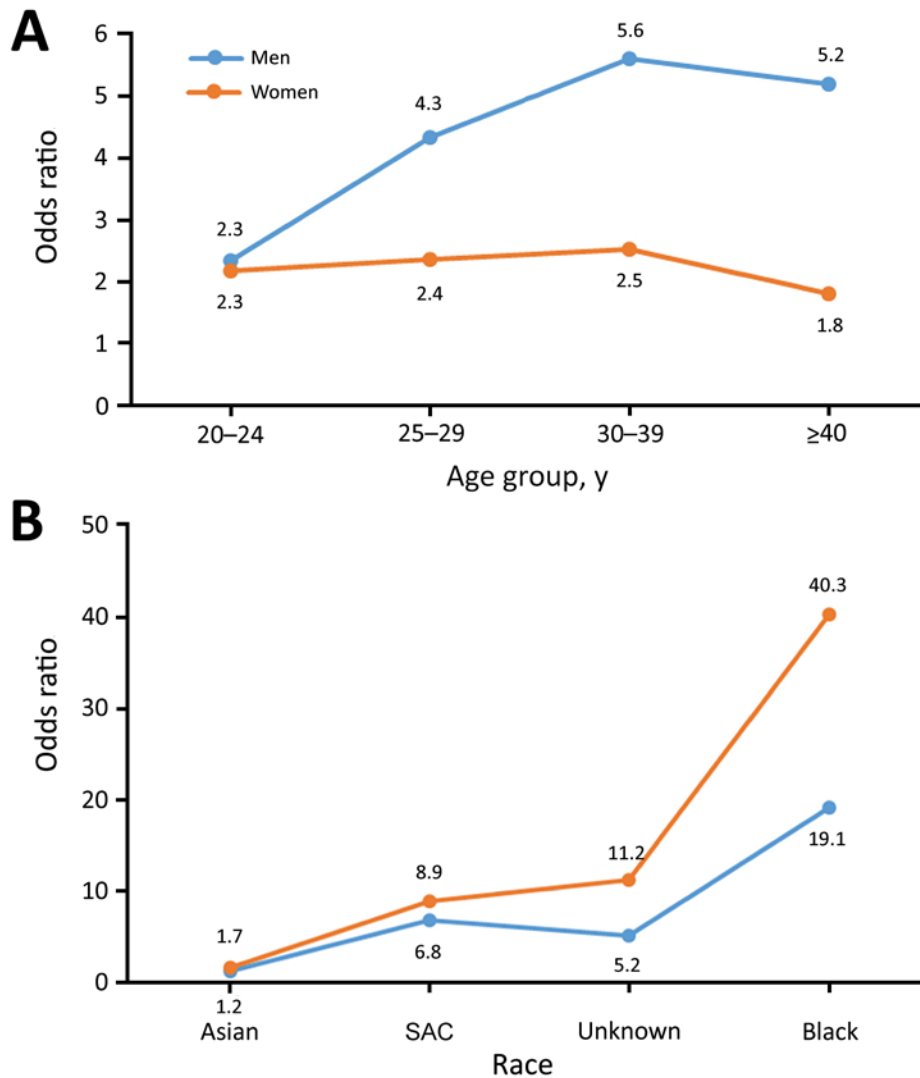

**Technical Appendix 1 Figure.** Interaction effects of age and sex (A) and race/ethnicity and sex (B) in the multivariate logistic regression model for HIV Infection. Adjusted odds ratios for each age or racial group compared with the reference group (age <20 years or white race) are graphed by sex. SAC, South African colored.
